# Supplementary material for: Characterization of Peptidyl-Prolyl Cis-Trans Isomerase- and Calmodulin-Binding Activity of a Cytosolic Arabidopsis thaliana Cyclophilin AtCyp19-3
Source: PubMed Central journal article supplement (PMC4552658; doi:10.1371/journal.pone.0136692), 2015-08-28
Supplement: pone.0136692.s005.pdf [file pone.0136692.s005.pdf]

**S1 Table:** Primers used for amplification of the full length *AtCyp19-3* and its truncated versions and *E.coli ppiA*. The restriction sites are underlined.

| <b>Protein</b>            | <b>Primer</b>                                                           | <b>Annealing temperature (°C)</b> | <b>Amplicon (bp)</b> |
|---------------------------|-------------------------------------------------------------------------|-----------------------------------|----------------------|
| AtCyp19-3                 | F: CGGAATTCATGGCGAATCCTAAAGTCTTC<br>R: CCGCTCGAGTTATGAACTTGGGTTCTTGAG   | 46                                | 528                  |
| AtCyp <sub>(71-176)</sub> | F: CGGGAATTCGGT GGAGATTTCACTCGTG<br>R: CCGCTCGAGTTATGAACTTGGGTTCTTGAG   | 51                                | 315                  |
| AtCyp <sub>(35-176)</sub> | F: CGGGAATTC AATTTCCGTGCTTTGTGCACT<br>R: CCGCTCGAGTTATGAACTTGGGTTCTTGAG | 52                                | 423                  |
| PpiA                      | F: AATGGATCCATGTTCAAATCGACCCTGGC<br>R: TAACTCGAGCGGCAGGACTTTAGCGG       | 62                                | 570                  |
