# Supplementary material for: Characterization of Peptidyl-Prolyl Cis-Trans Isomerase- and Calmodulin-Binding Activity of a Cytosolic Arabidopsis thaliana Cyclophilin AtCyp19-3
Source: PubMed Central journal article supplement (PMC4552658; doi:10.1371/journal.pone.0136692), 2015-08-28
Supplement: pone.0136692.s006.pdf [file pone.0136692.s006.pdf]

**S2 Table:** Percentage identity and similarity generated by MATGAT V 2.0 software for plant cyclophilins from different organism viz. *Triticum aestivum* (TaCypA-1), *Cajanus cajan* (CcCyp), *Camellia sinensis* (CsCyp), *Arabidopsis thaliana* (AtCyp18-3, AtCyp19-2, AtCyp19-1, AtCyp18-4, AtCyp19-3, AtCyp20-3), *Thellungiella halophila* (ThCyp1), *Oryza sativa* (OsCyp2) and *Schistosoma mansoni* (SmCypA).

**Identity %**

|           | AtCyp19-3 | TaCypA-1 | AtCyp18-3 | AtCyp19-1 | AtCyp20-3 | AtCyp18-4 | AtCyp19-2 | CcCyp | ThCyp1 | OsCyp2 | SmCypA | CsCYP |
|-----------|-----------|----------|-----------|-----------|-----------|-----------|-----------|-------|--------|--------|--------|-------|
| AtCyp19-3 |           | 69.9     | 72.7      | 65.0      | 41.8      | 72.7      | 72.3      | 60.2  | 74.0   | 71.0   | 62.8   | 76.1  |
| TaCypA-1  | 80.7      |          | 79.1      | 66.5      | 41.7      | 75.0      | 79.3      | 64.0  | 80.9   | 86.6   | 61.5   | 83.1  |
| AtCyp18-3 | 82.4      | 85.5     |           | 71.7      | 42.1      | 78.5      | 90.2      | 69.2  | 83.2   | 78.5   | 60.9   | 84.3  |
| AtCyp19-1 | 73.3      | 74.3     | 79.7      |           | 37.8      | 69.4      | 69.5      | 56.6  | 78.0   | 66.5   | 56.4   | 73.4  |
| AtCyp20-3 | 50.6      | 50.6     | 50.6      | 45.9      |           | 38.7      | 43.6      | 33.8  | 42.5   | 39.8   | 39.0   | 41.7  |
| AtCyp18-4 | 81.8      | 82.0     | 86.6      | 79.1      | 47.9      |           | 77.0      | 64.5  | 81.5   | 76.2   | 59.8   | 81.4  |
| AtCyp19-2 | 86.4      | 87.9     | 95.4      | 79.9      | 51.7      | 86.2      |           | 67.2  | 83.3   | 78.2   | 61.1   | 81.6  |
| CcCyp     | 70.5      | 73.8     | 77.3      | 66.9      | 44.0      | 76.7      | 77.0      |       | 65.9   | 62.2   | 50.8   | 72.1  |
| ThCyp1    | 85.8      | 86.7     | 90.2      | 82.7      | 51.0      | 90.2      | 94.3      | 76.3  |        | 80.9   | 59.8   | 85.5  |
| OsCyp2    | 81.8      | 90.7     | 84.3      | 73.3      | 49.4      | 82.0      | 86.8      | 70.3  | 87.9   |        | 60.9   | 83.1  |
| SmCypA    | 73.3      | 73.8     | 76.7      | 68.6      | 50.2      | 70.9      | 77.0      | 64.5  | 75.1   | 76.2   |        | 60.9  |
| CsCYP     | 84.7      | 86.6     | 91.3      | 80.2      | 49.8      | 89.0      | 91.4      | 81.4  | 91.3   | 86.6   | 76.2   |       |

**Similarity %**
